# Supplementary material for: Validation and Evaluation of Reference Genes for Quantitative Real-Time PCR Analysis in Mythimna loreyi (Lepidoptera: Noctuidae)
Source: MDPI journal article supplement (doi:10.3390/insects15030185), 2024-03-10
Supplement: s1 [file s1]

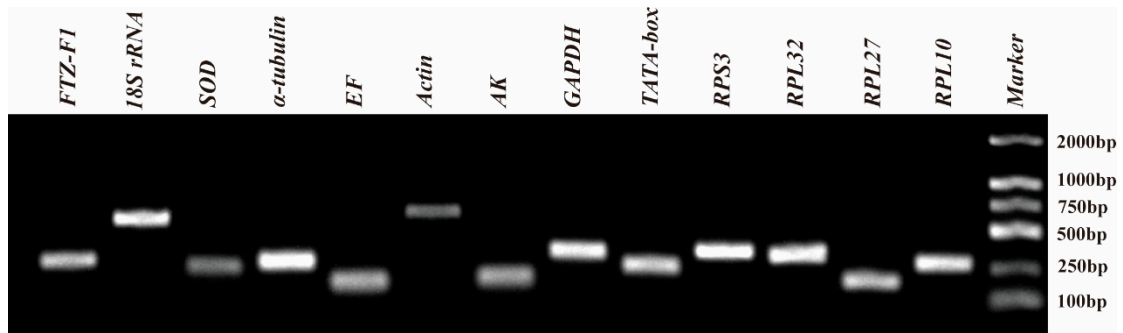

**Figure S1.** The presence of a single amplicon of the desired size for each candidate reference gene observed through visualization on 1.2% agarose gel.

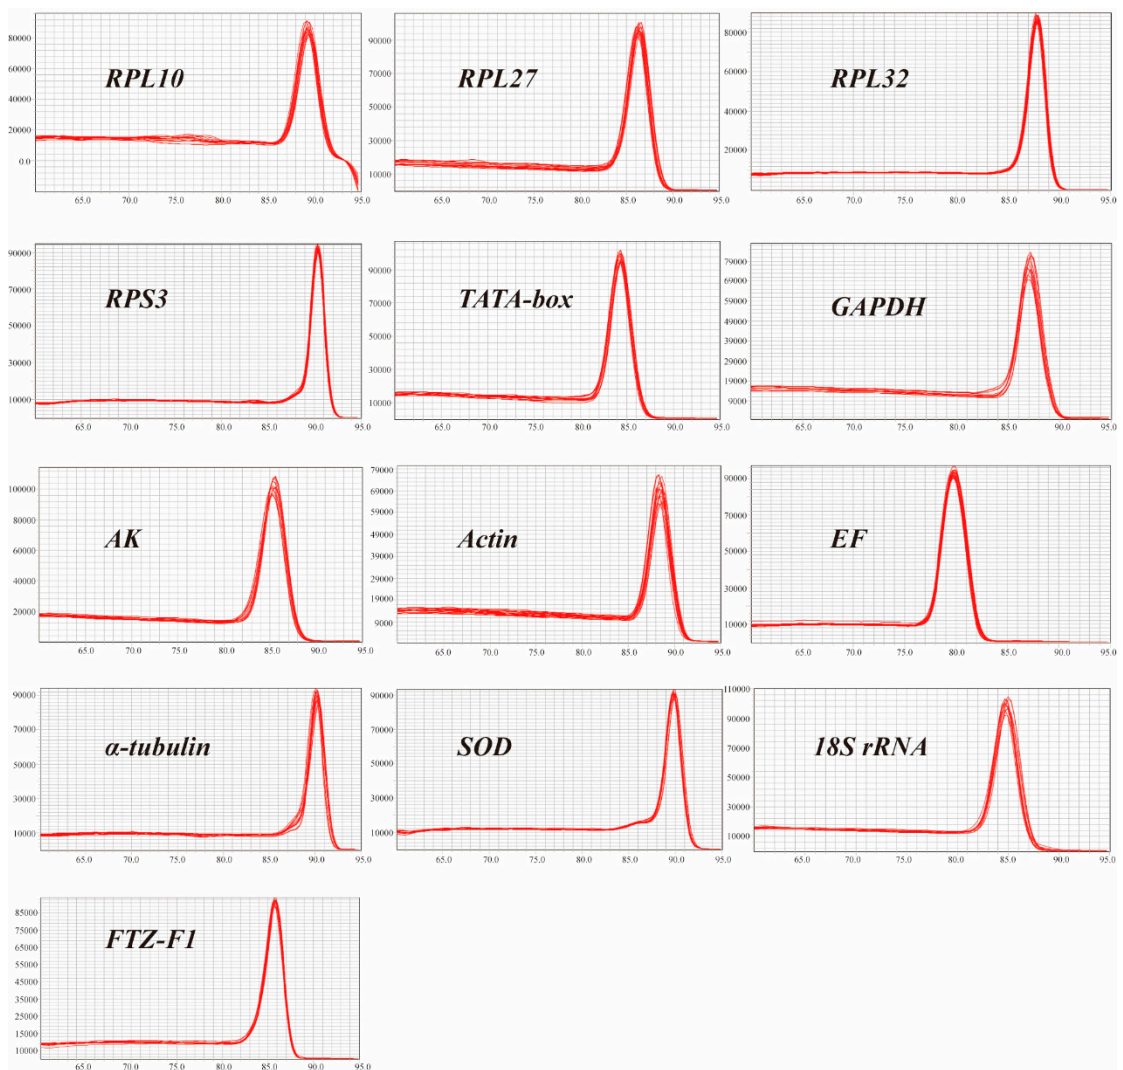

**Figure S2.** Melting curve analysis of thirteen candidate reference genes.

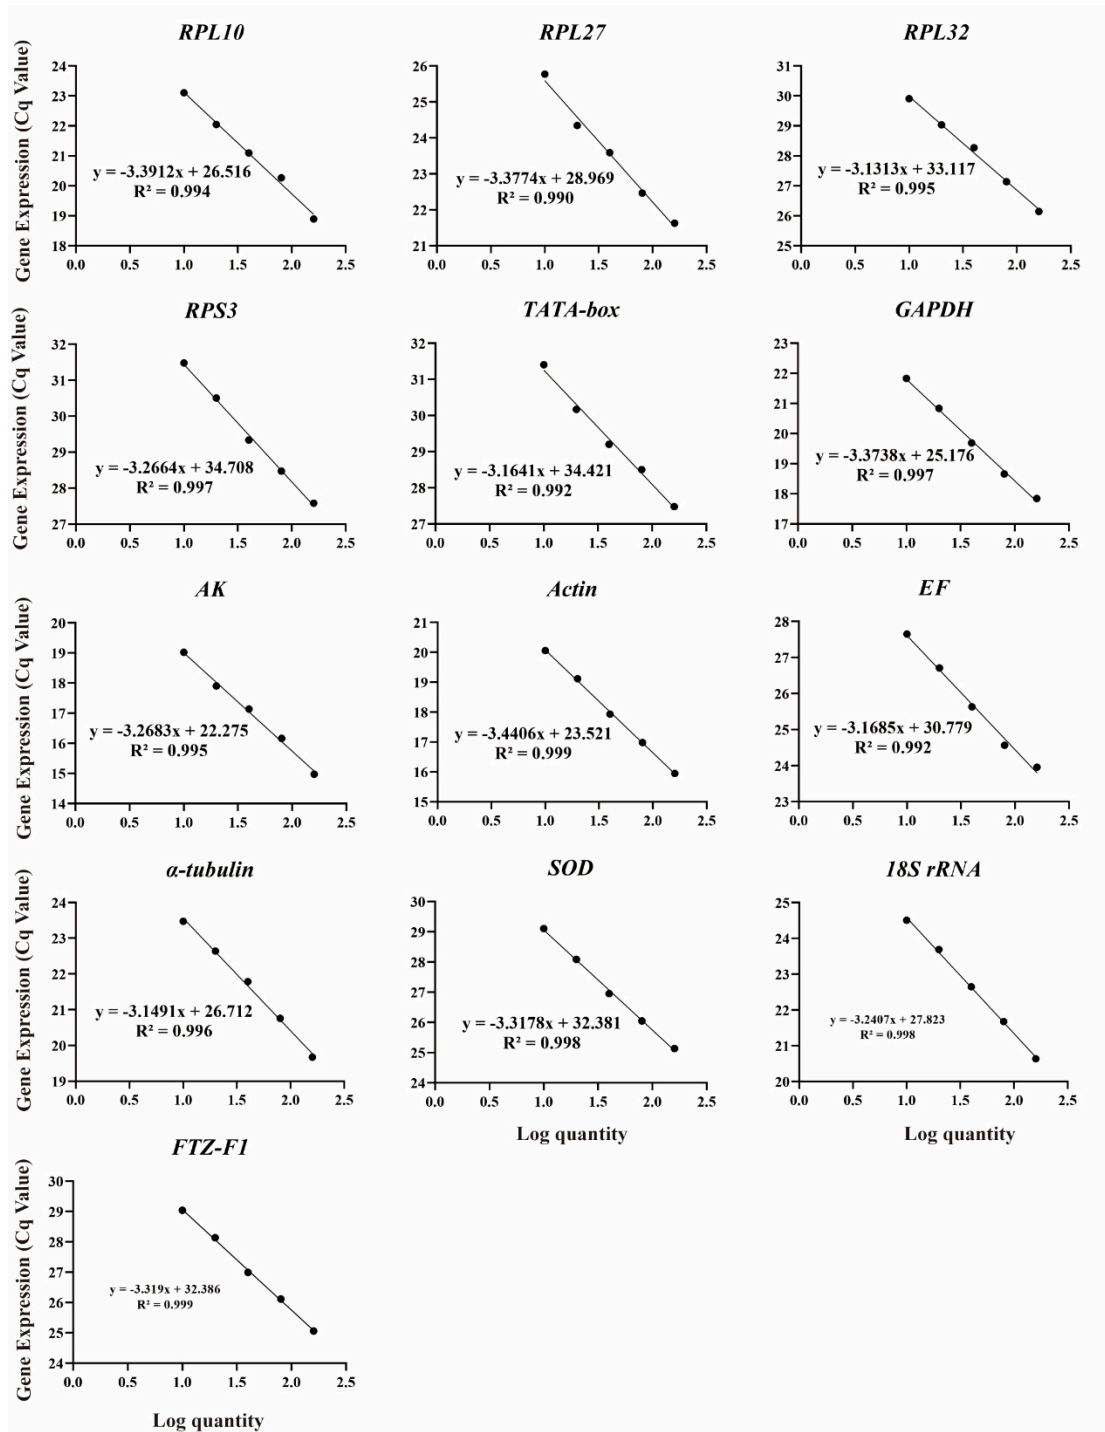

**Figure S3.** Standard curves of the thirteen candidate reference genes.

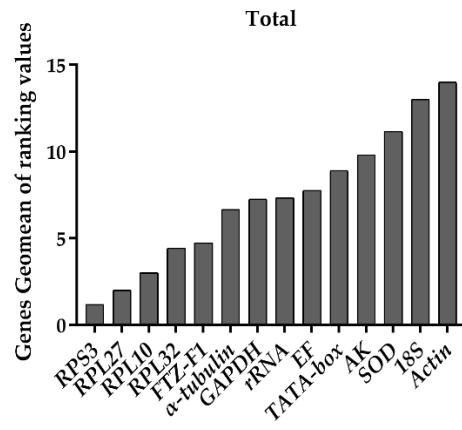

**Figure S4.** Expression stability of 13 candidate reference genes of *Mythimna loreyi* in all samples determined using RefFinder.
